# Supplementary material
Source: publisher figshare collection journal article supplement (https://karger.figshare.com/articles/dataset/_/4569742)
Supplement: Supplementary file 1 [file 1]

Table 1: Frequencies (%) of  $Hv^{Hb}$  introgressions in offspring of  $HbHbHvHv$  hybrids

| Hybrid            | No. of<br>prog. | progenies with $Hv^{Hb}$ -introgression |             |             |             |             |             |
|-------------------|-----------------|-----------------------------------------|-------------|-------------|-------------|-------------|-------------|
|                   |                 | 0 $Hv^{Hb}$                             | 1 $Hv^{Hb}$ | 2 $Hv^{Hb}$ | 3 $Hv^{Hb}$ | 4 $Hv^{Hb}$ | 5 $Hv^{Hb}$ |
| F <sub>2</sub> _1 | 35              | 34.3                                    | 37.1        | 20          | 8.6         | 0           | 0           |
| F <sub>3</sub> _1 | 65              | 40                                      | 35.4        | 18.5        | 1.5         | 4.6         | 0           |
| F <sub>3</sub> _2 | 56              | 0                                       | 12.5        | 26.8        | 16.1        | 25          | 19.6        |
| F <sub>3</sub> _3 | 11              | 0                                       | 9.1         | 9.1         | 45.5        | 18.2        | 18.2        |
| F <sub>3</sub> _4 | 3               | 0                                       | 0           | 0           | 0           | 100         | 0           |
| F <sub>4</sub> _1 | 12              | 66.7                                    | 25.0        | 8.3         | 0           | 0           | 0           |
